# Supplementary material for: Long-term morbidity and mortality in patients diagnosed with an insulinoma
Source: PubMed Central journal article supplement (PMC8784472; doi:10.1530/eje-21-0230), 2021-09-01
Supplement: supplementary_table_1.pdf [file supplementary_table_1.pdf]

Supplementary Table 1. Classification of endocrine, cardiovascular, gastrointestinal, and mental and behavioural disorders, according to the Finnish version of the ICD-10 since 1996, ICD-9 during 1987–1995, and ICD-8 during 1980–1986.

| Disease category                                      | Classification of diseases |                  |                                |
|-------------------------------------------------------|----------------------------|------------------|--------------------------------|
|                                                       | ICD-8                      | ICD-9            | ICD-10                         |
| Endocrine disorders <sup>a</sup>                      | 240–250, 252–258           | 240–250, 252–259 | E00–E14, E20–E35               |
| Diabetes                                              | 250                        | 250              | E10–E14                        |
| Thyroid disorders                                     | 240–246                    | 240–246          | E00–E07                        |
| Parathyroid disorders                                 | 252                        | 252              | E20–E21                        |
| Other endocrine disorders <sup>b</sup>                | 253–258                    | 253–258          | E22–E29, E31–E35               |
| Cardiovascular diseases <sup>c</sup>                  | 400–414, 423–458           | 401–417, 423–459 | I10–I28, I31, I34–I37, I42–I99 |
| Cerebrovascular diseases                              | 430–438                    | 430–438          | I60–I69                        |
| Hypertension                                          | 400–404                    | 401–405          | I10–I15                        |
| Arrhythmias and conduction disorders                  | 427,2–427,98               | 426–427          | I44–I49                        |
| Atrial fibrillation and flutter                       | 427,92                     | 4273A            | I48                            |
| Coronary artery disease                               | 410–414                    | 410–414          | I20–I25                        |
| Diseases of the arteries and veins                    | 440–448, 451–458           | 440–448, 451–459 | I70–I89                        |
| Valvular diseases and cardiomyopathies                | 423–425                    | 423–425          | I31, I34–I37, I42–I43          |
| Heart failure                                         | 427.0, 427.1, 428          | 428              | I50                            |
| Diseases of the pulmonary circulation                 | 426, 450                   | 415–417          | I26–I28                        |
| Gastrointestinal diseases                             | 530–577                    | 530–579          | K20–K93                        |
| Diseases of the oesophagus, stomach, and duodenum     | 530–537                    | 530–537          | K20–K31                        |
| Abdominal hernias                                     | 550–553                    | 550–553          | K40–K46                        |
| Chronic inflammatory bowel diseases                   | 563                        | 555–556          | K50–K51                        |
| Diseases of the appendix                              | 540–543                    | 540–543          | K35–K38                        |
| Other bowel diseases <sup>d</sup>                     | 560–562, 564–569           | 557–569          | K52–K67, K90–K93               |
| Diseases of the liver, biliary tract, and gallbladder | 570–576                    | 570–576          | K70–K83                        |
| Diseases of the pancreas                              | 577                        | 577              | K85–K87                        |
| Mental and behavioural disorders                      | 290–315                    | 290–315          | F00–F99                        |
| Dementia                                              | 290                        | 290              | F00–F03                        |

<sup>a</sup>Excluding hyperinsulinism and hypoglycemia, <sup>b</sup>Including pituitary, thymic, adrenal, ovarian, testicular, polyglandular and other or unspecified endocrine disorders, <sup>c</sup>Excluding rheumatic heart diseases and infectious endo-, peri- and myocardial diseases.

ICD International Classification of Diseases
