# Supplementary material for: Long-term morbidity and mortality in patients diagnosed with an insulinoma
Source: PubMed Central journal article supplement (PMC8784472; doi:10.1530/eje-21-0230), 2021-09-01
Supplement: supplementary_table_2.pdf [file supplementary_table_2.pdf]

Supplementary Table 2. Prevalence of endocrine, cardiovascular, gastrointestinal, psychiatric disorders and cancers in the 79 insulinoma patients diagnosed with an insulinoma in Finland during 1980–2010, and in 316 matched controls, before the diagnosis of insulinoma.

|                                                       | Patients<br>(n = 79) |      | Controls<br>(n = 316) |      | Patients vs controls |            |              |
|-------------------------------------------------------|----------------------|------|-----------------------|------|----------------------|------------|--------------|
|                                                       | n                    | (%)  | n                     | (%)  | Odds Ratio           | (95% CI)   | Significance |
| Endocrine disorders <sup>a</sup>                      | 7                    | 8.9  | 15                    | 4.7  | 1.94                 | 0.76–4.91  | 0.163        |
| Diabetes                                              | 4                    | 5.1  | 6                     | 1.9  | 2.67                 | 0.75–9.45  | 0.129        |
| Thyroid disorders                                     | 0                    | 0.0  | 5                     | 1.6  | 0.00                 | NA         | NA           |
| Parathyroid disorders                                 | 0                    | 0.0  | 1                     | 0.3  | 0.00                 | NA         | NA           |
| Other endocrine disorders <sup>b</sup>                | 3                    | 3.8  | 3                     | 0.9  | 4.00                 | 0.81–19.82 | 0.090        |
| Cardiovascular diseases                               | 20                   | 25.3 | 62                    | 19.6 | 1.45                 | 0.78–2.69  | 0.237        |
| Cerebrovascular diseases                              | 1                    | 1.3  | 7                     | 2.2  | 0.57                 | 0.07–4.64  | 0.601        |
| Hypertension                                          | 9                    | 11.4 | 18                    | 5.7  | 2.18                 | 0.92–5.13  | 0.075        |
| Arrhythmias and conduction disorders                  | 2                    | 2.5  | 9                     | 2.8  | 0.89                 | 0.19–4.11  | 0.880        |
| Atrial fibrillation and flutter                       | 1                    | 1.3  | 5                     | 1.6  | 0.80                 | 0.09–6.85  | 0.839        |
| Coronary artery disease                               | 2                    | 2.5  | 12                    | 3.8  | 0.65                 | 0.14–3.02  | 0.582        |
| Disease of the arteries and veins                     | 6                    | 7.6  | 35                    | 11.1 | 0.65                 | 0.26–1.63  | 0.362        |
| Valvular diseases and cardiomyopathies                | 3                    | 3.8  | 3                     | 0.9  | 7.81                 | 0.77–78.82 | 0.082        |
| Heart failure                                         | 2                    | 2.5  | 4                     | 1.3  | 2.17                 | 0.35–13.47 | 0.404        |
| Diseases of the pulmonary circulation                 | 0                    | 0.0  | 0                     | 0.0  | NA                   | NA         | NA           |
| Gastrointestinal diseases                             | 12                   | 15.2 | 46                    | 14.6 | 1.05                 | 0.52–2.14  | 0.884        |
| Diseases of the oesophagus, stomach, and duodenum     | 3                    | 3.8  | 6                     | 1.9  | 2.00                 | 0.50–8.00  | 0.327        |
| Abdominal hernias                                     | 6                    | 7.6  | 13                    | 4.1  | 2.03                 | 0.70–5.84  | 0.190        |
| Chronic inflammatory bowel diseases                   | 0                    | 0.0  | 1                     | 0.3  | 0.00                 | NA         | NA           |
| Diseases of the appendix                              | 1                    | 1.3  | 8                     | 2.5  | 0.50                 | 0.06–4.00  | 0.513        |
| Other bowel diseases                                  | 2                    | 2.5  | 12                    | 3.8  | 0.66                 | 0.14–3.00  | 0.589        |
| Diseases of the liver, biliary tract, and gallbladder | 2                    | 2.5  | 16                    | 5.1  | 0.48                 | 0.11–2.16  | 0.342        |
| Diseases of the pancreas                              | 1                    | 1.3  | 1                     | 0.3  | 4.00                 | 0.25–63.95 | 0.327        |
| Mental and behavioural disorders                      | 8                    | 10.1 | 22                    | 7.0  | 1.53                 | 0.64–3.64  | 0.339        |
| Dementia                                              | 0                    | 0.0  | 4                     | 1.3  | 0.00                 | NA         | NA           |
| Cancers                                               | 2                    | 2.5  | 8                     | 2.5  | 1.00                 | 0.20–4.90  | 1.000        |

<sup>a</sup>Excluding hyperinsulinism and hypoglycemia, <sup>b</sup>Other endocrine disorders in the patient group included a pituitary disorder (n=1), and other or unspecified endocrine disorders (n=2).

CI Confidence Interval. NA not applicable. Bold text indicates a statistically significant Odds ratio ( $p < 0.05$ , Conditional logistic regression).
