# Supplementary material for: Long-term morbidity and mortality in patients diagnosed with an insulinoma
Source: PubMed Central journal article supplement (PMC8784472; doi:10.1530/eje-21-0230), 2021-09-01
Supplement: supplementary_table_3.pdf [file supplementary_table_3.pdf]

Supplementary Table 3. Univariate Cox regression analysis of factors associated with mortality in the 79 patients diagnosed with an insulinoma in Finland during 1980–2010.

|                                                                          | Hazard Ratio | 95% CI     | Significance     |
|--------------------------------------------------------------------------|--------------|------------|------------------|
| <b>Clinical factors</b>                                                  |              |            |                  |
| Age at diagnosis (n = 79)                                                | 1.05         | 1.02–1.08  | <b>0.001</b>     |
| Male (n = 24) vs. female (n = 55)                                        | 1.03         | 0.44–2.39  | 0.955            |
| Symptom duration before diagnosis (n = 75)                               | 1.00         | 1.00–1.01  | 0.293            |
| Decade of diagnosis (reference: 2000s, n = 43)                           |              |            |                  |
| 1990s (n = 17)                                                           | 1.58         | 0.55–4.59  | 0.397            |
| 1980s (n = 19)                                                           | 1.17         | 0.37–3.67  | 0.793            |
| <b>Preoperative laboratory tests</b>                                     |              |            |                  |
| Lowest spontaneous plasma glucose, mmol/l (n = 62)                       | 2.03         | 0.85–4.82  | 0.111            |
| Highest spontaneous serum insulin, mU/l (n = 49) <sup>a</sup>            | 1.10         | 1.01–1.20  | <b>0.037</b>     |
| Highest spontaneous serum C-peptide, nmol/l (n = 39)                     | 1.74         | 0.99–3.04  | 0.053            |
| Plasma glucose nadir in the fasting test, mmol/l (n = 64)                | 1.10         | 0.58–2.11  | 0.770            |
| Corresponding serum insulin in the fasting test, mU/l (n = 55)           | 1.01         | 0.99–1.03  | 0.265            |
| Corresponding serum C-peptide in the fasting test, nmol/l (n = 44)       | 1.04         | 0.40–2.72  | 0.939            |
| Glycated haemoglobin, HbA1c, % (n = 31)                                  | 0.97         | 0.23–4.12  | 0.971            |
| <b>Treatment-related factors</b>                                         |              |            |                  |
| Surgery (reference: curative-intent surgery, n = 71)                     |              |            |                  |
| Palliative surgery (n = 2)                                               | 17.01        | 3.45–83.92 | <b>0.001</b>     |
| No surgery (n = 6)                                                       | 9.86         | 3.60–27.00 | <b>&lt;0.001</b> |
| Surgical method (reference: enucleation, n = 31)                         |              |            |                  |
| Distal resection (n = 33)                                                | 1.21         | 0.44–3.30  | 0.717            |
| Pancreatico-duodenectomy (n = 9)                                         | 2.11         | 0.54–8.23  | 0.283            |
| Major surgical complications <sup>b</sup> : yes (n = 18) vs. no (n = 55) | 3.06         | 1.15–8.12  | <b>0.025</b>     |
| Preoperative medication <sup>c</sup> : yes (n = 55) vs. no (n = 24)      | 0.97         | 0.42–2.24  | 0.934            |
| Postoperative medication <sup>d</sup> yes (n = 19) vs. no (n = 53)       | 3.09         | 1.23–7.75  | <b>0.016</b>     |
| Postoperative diazoxide: yes (n = 8) vs. no (n = 63)                     | 4.56         | 1.59–13.03 | <b>0.005</b>     |
| Postoperative somatostatin analogue: yes (n = 19) vs. no (n = 54)        | 2.04         | 0.84–4.95  | 0.113            |
| <b>Tumour-related factors</b>                                            |              |            |                  |
| Tumour size ≥ 2 cm (n = 20) vs. < 2 cm (n = 55)                          | 2.79         | 1.19–6.55  | <b>0.018</b>     |
| Multiple (n = 5) vs. solitary tumour (n = 73)                            | 0.67         | 0.09–5.05  | 0.700            |
| Tumour localization: head/neck (n = 39) vs. body/tail (n = 38)           | 0.97         | 0.43–2.21  | 0.949            |
| Distant metastases: yes (n = 9) vs. no (n = 70)                          | 5.06         | 2.06–12.41 | <b>&lt;0.001</b> |
| Clinical TNM staging (7) (reference: Stage I, n = 58)                    |              |            |                  |
| II (n = 10)                                                              | 1.88         | 0.53–6.66  | 0.328            |
| III (n = 0)                                                              |              |            |                  |
| IV (n = 9)                                                               | 5.06         | 1.99–12.88 | <b>0.001</b>     |

<sup>a</sup>Hazard Ratio calculated for a 10mU/l rise in plasma insulin concentration, <sup>b</sup>Classified as grades III–V of the Clavien-Dindo classification (8, 9), <sup>c</sup>Including medical treatment of inoperable patients,

<sup>d</sup>Including diazoxide (n=8), somatostatin analogue (n=19), peroral corticosteroids (n=3), interferon alpha (n=3), 5-fluorouracil-streptozotocin (n=2), streptozotocin (n=1), epirubicin (n=1), doxorubicin (n=1), and sunitinib (n=1).

CI Confidence Interval. Bold text indicates a statistically significant hazard ratio ( $p < 0.05$ , Cox proportional hazards model).
