# Supplementary material for: Long-term morbidity and mortality in patients diagnosed with an insulinoma
Source: PubMed Central journal article supplement (PMC8784472; doi:10.1530/eje-21-0230), 2021-09-01
Supplement: supplementary_table_4.pdf [file supplementary_table_4.pdf]

Supplementary Table 4. Multivariate analysis of factors associated with mortality in surgically treated insulinoma patients (n=73).

| Variable                                      | Hazard Ratio | 95% CI     | Significance |
|-----------------------------------------------|--------------|------------|--------------|
| Age at surgery                                | 1.08         | 1.03–1.13  | <b>0.001</b> |
| Surgical method (reference: enucleation)      |              |            |              |
| Distal resection                              | 0.81         | 0.27–2.44  | 0.704        |
| Pancreatico-duodenectomy                      | 4.07         | 0.80–20.87 | 0.092        |
| Time period of surgery (reference: 1980–1989) |              |            |              |
| 1990–1999                                     | 1.20         | 0.35–4.12  | 0.775        |
| 2000–2010                                     | 0.39         | 0.09–1.73  | 0.213        |
| Distant metastases                            | 4.58         | 1.29–16.25 | <b>0.018</b> |

CI Confidence Interval. Bold text indicates a statistically significant hazard ratio ( $p < 0.05$ , Cox proportional hazards model)
